# Supplementary material for: Exploration of Human Salivary Microbiomes—Insights into the Novel Characteristics of Microbial Community Structure in Caries and Caries-Free Subjects
Source: PLoS One. 2016 Jan 19;11(1):e0147039. doi: 10.1371/journal.pone.0147039 (PMC4718657; doi:10.1371/journal.pone.0147039)
Supplement: S1 Table — (XLSX) [file pone.0147039.s004.xlsx]

## Sheet: Sheet1
Table S1 Four diversity indices were calculated from each salivary sample.
group	Chao1	ACE	Simpson	Shannon
H1	1260.55	2000.58	0.073706	3.17627
H2	1909.38	3151.4	0.046306	4.10484
H3	1654.78	3004.47	0.029585	4.45146
H4	1008.9	1271.48	0.039942	3.95802
H5	1507.55	2861.98	0.055693	3.83586
H6	1476.39	2163.68	0.078387	3.52416
H7	971.088	1374.75	0.174742	2.7589
H8	1250.71	1817.66	0.063286	3.72718
H9	1211.3	1679.94	0.057265	3.7433
H10	1534.87	2543.55	0.083016	3.55753
C1	1778	3308.92	0.045249	4.07824
C2	1129.63	1663.55	0.074865	3.72923
C3	1394.29	2457.52	0.043066	4.07449
C4	1138.89	1994.06	0.031408	4.17258
C5	1276.77	2157.8	0.168757	2.96508
C6	1346.46	2234.59	0.035377	4.14989
C7	2614.7	4147.96	0.070169	3.91951
C8	2515.57	3817.14	0.045659	4.11326
C9	2703.21	4982.64	0.041325	4.26441
C10	3409.45	6182.78	0.050378	4.17335
